# Supplementary material for: Measuring cellular forces using bis-aliphatic hydrazone crosslinked stress-relaxing hydrogels
Source: PubMed Central journal article supplement (PMC4445372; doi:10.1039/c4sm01365d), 2014-09-29
Supplement: SM-010-C4SM01365D-s001.pdf [file SM-010-C4SM01365D-s001.pdf]

Supporting Information

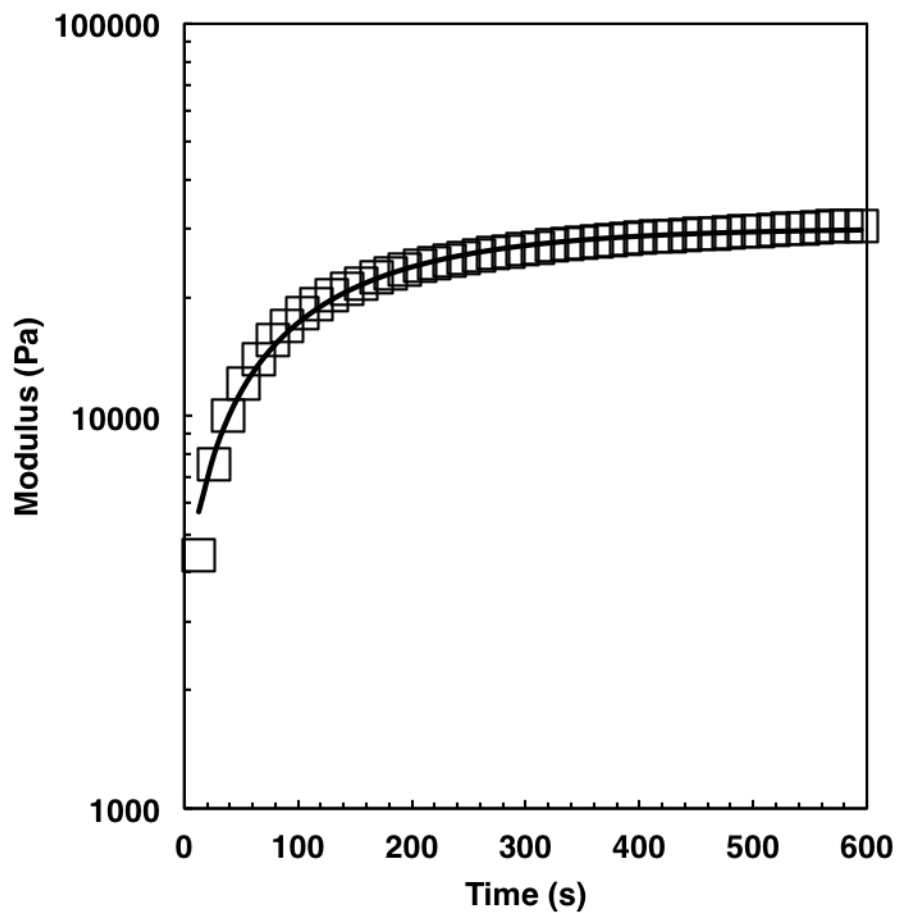

**Figure 1.** Evolution of the shear elastic modulus of the stoichiometric 8-H:8-AA hydrogel. Fitting these data to Equation 1, the equilibrium modulus,  $G_{eq}$ , is 30 kPa unswollen. After swelling, this value declines to *ca.* 10 kPa, which was previously reported. The data are the open squares and the fit is the solid line.

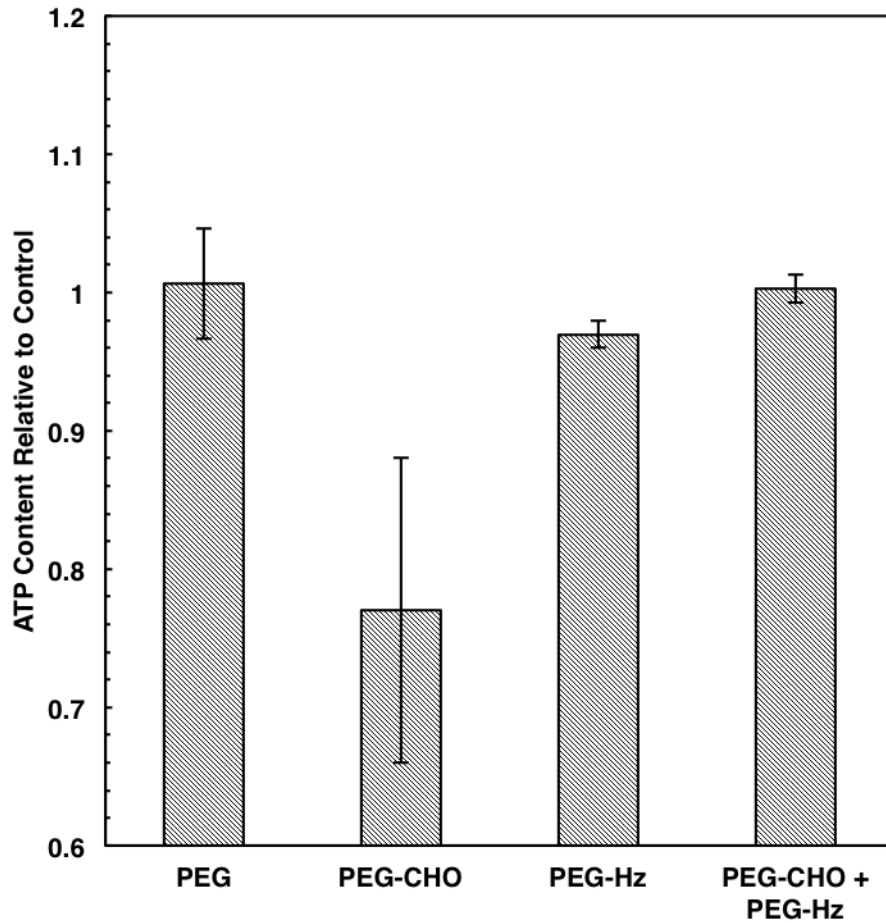

**Figure 2.** Plated human mesenchymal stem cells (hMSCs) were plated and allowed to adhere and spread for 48 hours. Cells were then treated with 10 kDa 8-arm PEG-alcohol, 10 kDa 8-arm PEG-aldehyde, 1.25 kDa monofunctional PEG-hydrazine, or a combination of both the aldehyde- and hydrazine-terminated PEG in concentrations 4.7 times lower than they were exposed to in the hydrogel (10 mM). After 2 hours of incubation, the cells were lysed and ATP content was measured. The ATP content of the PEG-aldehyde exposed cells was lower than the other three conditions, indicating PEG-aldehyde is deleterious to cell health. PEG-hydrazine mitigates this effect due to the hydrazine groups outcompeting the cellular functional groups for the free aldehydes. The error bars represent the standard deviation between three independent trials.
